# Supplementary material
Source: PubMed Central journal article supplement (PMC7711932)
Supplement: ao0c04948_si_001.pdf [file ao0c04948_si_001.pdf]

## SUPPORTING INFORMATION

### Niobia Nanofiber-Reinforced Protective Niobium Oxide/Acrylate Nanocomposite Coatings

Ubong Eduok\*

*College of Engineering, University of Saskatchewan, 57 Campus Drive, Saskatoon, S7N 5A9, Saskatchewan, Canada*

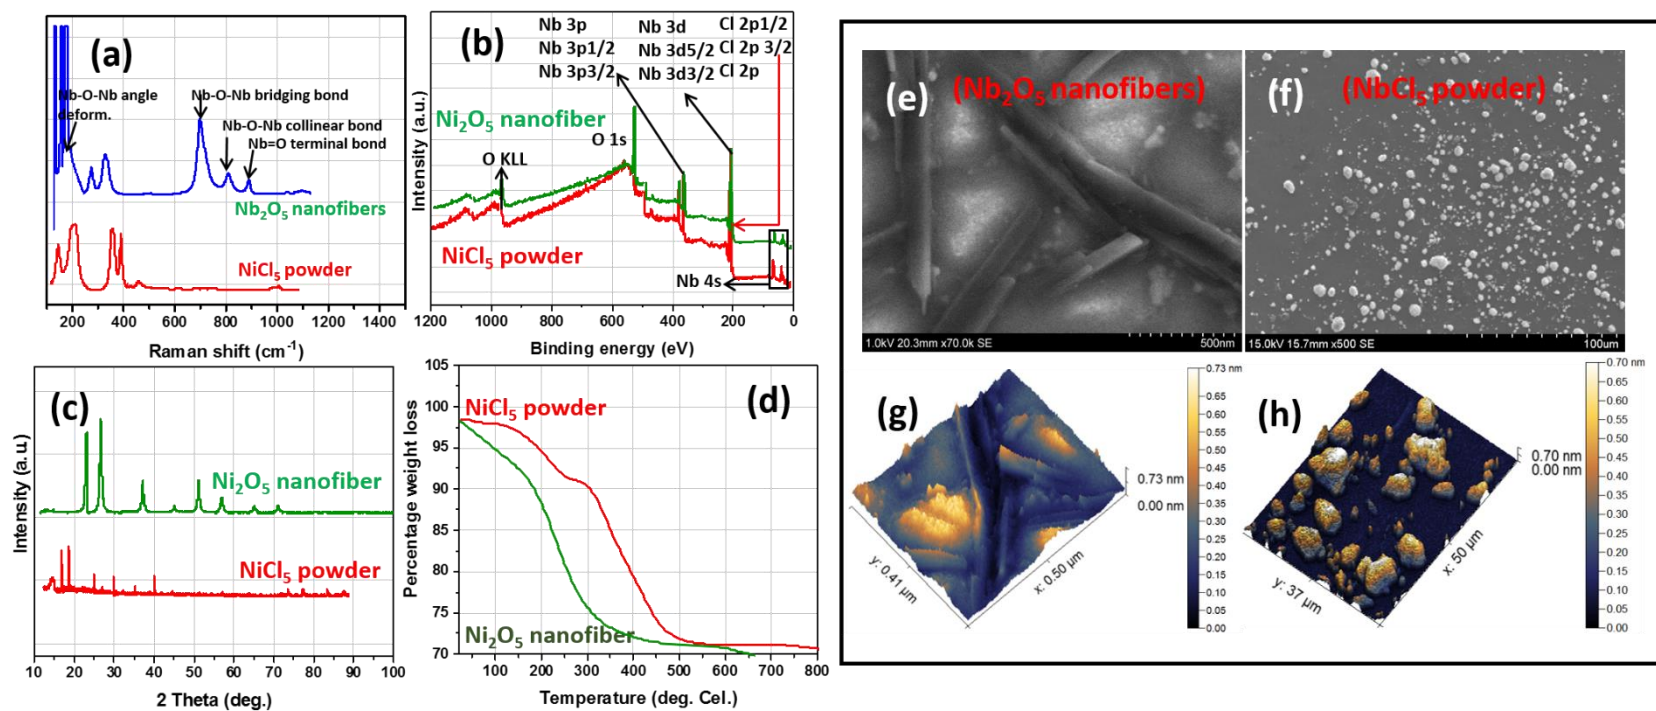

Figure S1. **LHS:** Raman (a), XPS (b), XRD (c), TGA (d) spectra of niobia nanofibers and niobium chloride precursor; **RHS:** SEM (e,f) and AFM (g,h) micrographs of niobia nanofibers and niobium chloride precursor.

Table S1. Electrochemical parameters for bare and doped nanocomposite coated steel substrates in 3.5 wt% NaCl

| Substrate | $R_{\text{soln}}$ ( $\Omega \text{ cm}^2$ ) |               | $R_{\text{coating}}$ ( $\text{k}\Omega \text{ cm}^2$ ) |               | $Q_{\text{coating}}$ ( $Y_0, \mu\text{F cm}^{-2} \text{ s}^{-(1-\alpha c)}$ ) |               | $R_{\text{ct}}$ ( $\text{k}\Omega \text{ cm}^2$ ) |               | $Q_{\text{dl}}$ ( $Y_0, \mu\text{F cm}^{-2} \text{ s}^{-(1-\alpha c)}$ ) |               | $j_{\text{corr}}$ ( $\mu\text{A cm}^{-2}$ ) | $-E_{\text{corr}}$ (V vs $V_{\text{ref}}$ ) |
|-----------|---------------------------------------------|---------------|--------------------------------------------------------|---------------|-------------------------------------------------------------------------------|---------------|---------------------------------------------------|---------------|--------------------------------------------------------------------------|---------------|---------------------------------------------|---------------------------------------------|
|           | Day 1                                       | After 30 days | Day 1                                                  | After 30 days | Day 1                                                                         | After 30 days | Day 1                                             | After 30 days | Day 1                                                                    | After 30 days | Day 1                                       |                                             |
| Bare      | 11.2                                        | 20.1          | —                                                      | —             | —                                                                             | —             | <0.21                                             | <0.21         | 112.8                                                                    | 145.4         | 200.5                                       | 0.65                                        |
| NB        | 10.1                                        | 11.2          | 6.7                                                    | 1.7           | 125.5                                                                         | 198.2         | 62.2                                              | 32.0          | 85.4                                                                     | 150.4         | 8.2                                         | 0.40                                        |
| NB2       | 12.4                                        | 17.4          | 10.2                                                   | 2.5           | 88.7                                                                          | 156.9         | 85.5                                              | 41.4          | 75.8                                                                     | 114.5         | 5.5                                         | 0.42                                        |
| NB4       | 24.3                                        | 15.7          | 15.8                                                   | 4.4           | 28.8                                                                          | 131.4         | 98.7                                              | 49.7          | 68.5                                                                     | 100.8         | 2.4                                         | 0.45                                        |
| NB6       | 23.2                                        | 10.8          | 88.3                                                   | 30.4          | 0.5                                                                           | 51.5          | 200.8                                             | 107.7         | 1.2                                                                      | 45.4          | 0.01                                        | 0.36                                        |
| NB8       | 14.7                                        | 12.1          | 54.5                                                   | 20.1          | 6.5                                                                           | 99.1          | 150                                               | 88.4          | 12.5                                                                     | 77.8          | 0.8                                         | 0.50                                        |

Day 1 means immediately after exposure of the coated substrates to the saline corrodent. The experimental data for bare and coated substrates were theoretically fitted with  $R_{\text{soln}}(R_{\text{ct}}, Q_{\text{dl}})$  and  $R_{\text{soln}}(R_{\text{coating}}(Q_{\text{c}}, R_{\text{ct}}, Q_{\text{dl}}))$  equivalent circuit models, respectively.

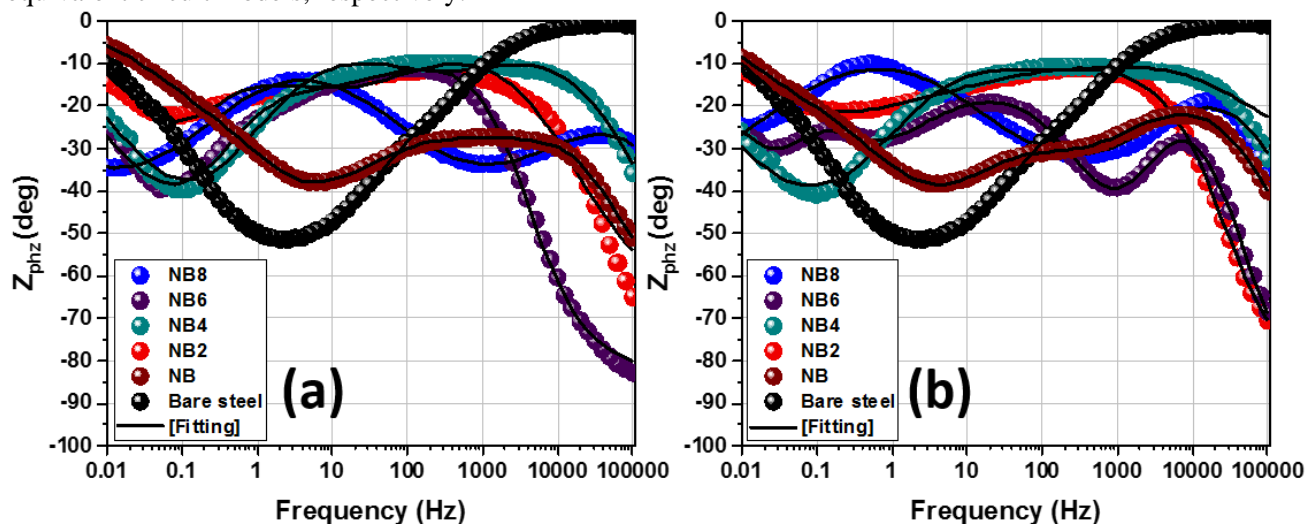

Figure S2. Bode phase-angle curves for coated (NB, NB2-8) and uncoated steel substrates immediately after immersion (a) and after 30-day exposure duration (b) in saline 3.5 wt.% NaCl electrolytes.
